# Supplementary material
Source: MDPI journal article supplement (https://www.mdpi.com/2072-4292/15/10/2625)
Supplement: s1 [file s1]

**Table S1.** The result of predictors which were significantly related to sampled AGB with marks \*, and \*\* as  $p$ -values of a  $t$ -test below 0.05 and 0.01, respectively.

| Stratification                          | Group                              | Variables | $r$      | Predictors |
|-----------------------------------------|------------------------------------|-----------|----------|------------|
| With<br>topographical<br>stratification | Whole forests                      | HH        | 0.111**  | YES        |
|                                         |                                    | HV        | 0.122**  | YES        |
|                                         |                                    | NP        | -0.064*  | YES        |
|                                         |                                    | VV_HOM    | -0.082** | NO         |
|                                         |                                    | VV_ASM    | -0.089** | NO         |
|                                         |                                    | VV_ENE    | -0.092** | NO         |
|                                         |                                    | VV_MAX    | -0.092** | NO         |
|                                         |                                    | VV_ENT    | 0.095**  | YES        |
|                                         |                                    | VV_VAR    | -0.091** | YES        |
|                                         |                                    | B2        | -0.236** | YES        |
|                                         |                                    | B3        | -0.212** | NO         |
|                                         |                                    | B4        | -0.253** | NO         |
|                                         |                                    | B5        | -0.213** | YES        |
|                                         |                                    | B6        | 0.178**  | NO         |
|                                         |                                    | B7        | 0.194**  | NO         |
|                                         |                                    | B8        | 0.187**  | NO         |
|                                         |                                    | B8a       | 0.190**  | NO         |
|                                         |                                    | B11       | -0.117** | NO         |
|                                         |                                    | B12       | -0.230** | NO         |
|                                         |                                    | RVI       | 0.279**  | YES        |
|                                         |                                    | DVI       | 0.215**  | NO         |
|                                         |                                    | NDVI      | 0.249**  | NO         |
|                                         |                                    | EVI       | 0.194**  | NO         |
|                                         |                                    | S2REP     | 0.214**  | NO         |
|                                         |                                    | REIP      | 0.214**  | NO         |
|                                         |                                    | SAVI      | 0.182**  | NO         |
|                                         |                                    | MTCI      | 0.190**  | YES        |
|                                         |                                    | MCARI     | 0.211**  | YES        |
|                                         |                                    | H         | 0.156**  | YES        |
|                                         |                                    | A         | 0.101**  | YES        |
|                                         |                                    | SPI       | 0.145**  | YES        |
|                                         | Deciduous broad-<br>leaved forests | VV        | -0.077*  | YES        |
|                                         |                                    | NP        | -0.083*  | YES        |
|                                         |                                    | V/H_C     | 0.081*   | NO         |
|                                         |                                    | VV_MEA    | -0.130** | NO         |
|                                         |                                    | VV_VAR    | -0.137** | YES        |
|                                         |                                    | B2        | -0.127** | YES        |
|                                         |                                    | B3        | -0.120** | NO         |
|                                         |                                    | B4        | -0.176** | NO         |
|                                         |                                    | B5        | -0.164** | NO         |
|                                         |                                    | B6        | 0.127**  | NO         |
|                                         |                                    | B7        | 0.156**  | NO         |
|                                         |                                    | B8        | 0.145**  | NO         |
|                                         |                                    | B8a       | 0.152**  | NO         |
|                                         |                                    | B11       | -0.099** | YES        |
|                                         |                                    | B12       | -0.187** | YES        |

|                                      |               |        |          |     |
|--------------------------------------|---------------|--------|----------|-----|
|                                      |               | RVI    | 0.224**  | YES |
|                                      |               | DVI    | 0.161**  | NO  |
|                                      |               | NDVI   | 0.180**  | NO  |
|                                      |               | EVI    | 0.164**  | YES |
|                                      |               | S2REP  | 0.166**  | NO  |
|                                      |               | REIP   | 0.166**  | NO  |
|                                      |               | SAVI   | 0.134**  | YES |
|                                      |               | MTCI   | 0.156**  | YES |
|                                      |               | MCARI  | 0.166**  | YES |
|                                      |               | A      | 0.097**  | YES |
| Evergreen coniferous forests         |               | SPI    | 0.169**  | YES |
|                                      |               | HH     | 0.552**  | YES |
|                                      |               | RFDI   | -0.511*  | NO  |
|                                      |               | V/H_L  | 0.527**  | YES |
|                                      |               | VV     | 0.389*   | NO  |
|                                      |               | VV_COR | 0.487*   | YES |
| Deciduous coniferous forests         |               | B2     | -0.372** | NO  |
|                                      |               | B3     | -0.392** | YES |
|                                      |               | B4     | -0.341** | NO  |
|                                      |               | B5     | -0.371** | NO  |
|                                      |               | B11    | -0.224*  | NO  |
|                                      |               | B12    | -0.291** | NO  |
|                                      |               | RVI    | 0.305**  | YES |
|                                      |               | DVI    | 0.198*   | NO  |
|                                      |               | NDVI   | 0.289**  | NO  |
|                                      |               | EVI    | 0.303**  | NO  |
|                                      |               | S2REP  | 0.241**  | NO  |
|                                      |               | REIP   | 0.241**  | NO  |
|                                      |               | MTCI   | 0.207*   | YES |
|                                      |               | MCARI  | 0.283**  | NO  |
| Mixed broadleaf-conifer forests      |               | HH     | 0.345**  | YES |
|                                      |               | HV     | 0.270**  | YES |
|                                      |               | RFDI   | -0.225** | NO  |
|                                      |               | VV     | 0.173*   | NO  |
|                                      |               | VV_MEA | 0.244**  | YES |
|                                      |               | VV_VAR | 0.233**  | NO  |
|                                      |               | VV_COR | 0.231**  | NO  |
|                                      |               | VH_DIS | 0.178*   | YES |
|                                      |               | B2     | -0.307** | YES |
|                                      |               | B3     | -0.300** | NO  |
|                                      |               | B4     | -0.270** | NO  |
|                                      |               | B5     | -0.261** | NO  |
|                                      |               | B11    | -0.286** | NO  |
|                                      |               | B12    | -0.260** | NO  |
| Without topographical stratification | Whole forests | NDVI   | 0.191*   | NO  |
|                                      |               | MCARI  | 0.196*   | YES |
|                                      |               | H      | 0.391**  | YES |
|                                      |               | HH     | 0.125**  | YES |
|                                      |               | HV     | 0.125**  | YES |
|                                      |               | NP     | -0.060*  | YES |
|                                      |               | VV_HOM | -0.088** | NO  |

|                                |        |          |     |
|--------------------------------|--------|----------|-----|
| Deciduous broad-leaved forests | VV_ASM | -0.100** | NO  |
|                                | VV_ENE | -0.101** | NO  |
|                                | VV_MAX | -0.102** | YES |
|                                | VV_ENT | 0.101**  | NO  |
|                                | VV_MEA | -0.071*  | NO  |
|                                | VV_VAR | -0.096** | YES |
|                                | B2     | -0.237** | YES |
|                                | B3     | -0.210** | NO  |
|                                | B4     | -0.254** | NO  |
|                                | B5     | -0.213** | YES |
|                                | B6     | 0.177**  | NO  |
|                                | B7     | 0.194**  | NO  |
|                                | B8     | 0.185**  | NO  |
|                                | B8a    | 0.190**  | NO  |
|                                | B11    | -0.120** | NO  |
|                                | B12    | -0.231** | NO  |
|                                | RVI    | 0.278**  | YES |
|                                | DVI    | 0.213**  | NO  |
|                                | NDVI   | 0.249**  | NO  |
|                                | EVI    | 0.194**  | YES |
|                                | S2REP  | 0.214**  | NO  |
|                                | REIP   | 0.214**  | NO  |
|                                | SAVI   | 0.180**  | NO  |
|                                | MTCI   | 0.175**  | YES |
|                                | MCARI  | 0.209**  | YES |
|                                | H      | 0.157**  | YES |
|                                | A      | 0.105**  | YES |
|                                | SPI    | 0.109*   | YES |
|                                | HH     | 0.085*   | YES |
|                                | VV     | -0.083*  | NO  |
|                                | NP     | -0.080*  | YES |
|                                | V/H_C  | 0.078*   | NO  |
|                                | VV_MEA | -0.136** | NO  |
|                                | VV_VAR | -0.143** | YES |
|                                | B2     | -0.127** | YES |
|                                | B3     | -0.117** | NO  |
|                                | B4     | -0.177** | NO  |
|                                | B5     | -0.163** | NO  |
|                                | B6     | 0.127**  | NO  |
|                                | B7     | 0.157**  | NO  |
|                                | B8     | 0.144**  | NO  |
|                                | B8a    | 0.153**  | NO  |
|                                | B11    | -0.102** | YES |
|                                | B12    | -0.188** | YES |
|                                | RVI    | 0.223**  | YES |
|                                | DVI    | 0.160**  | NO  |
|                                | NDVI   | 0.180**  | NO  |
|                                | EVI    | 0.163**  | YES |
|                                | S2REP  | 0.167**  | NO  |
|                                | REIP   | 0.167**  | NO  |
|                                | SAVI   | 0.133**  | YES |

|                                 |        |          |     |
|---------------------------------|--------|----------|-----|
| Evergreen coniferous forests    | MTCI   | 0.139**  | YES |
|                                 | MCARI  | 0.165**  | YES |
|                                 | A      | 0.106**  | YES |
|                                 | SPI    | 0.125*   | YES |
|                                 | HH     | 0.517**  | YES |
|                                 | V/H_L  | 0.426*   | YES |
| Deciduous coniferous forests    | VV_COR | 0.460*   | YES |
|                                 | B2     | −0.374** | NO  |
|                                 | B3     | −0.388** | YES |
|                                 | B4     | −0.342** | NO  |
|                                 | B5     | −0.367** | NO  |
|                                 | B11    | −0.225*  | NO  |
|                                 | B12    | −0.293** | NO  |
|                                 | RVI    | 0.303**  | NO  |
|                                 | DVI    | 0.196*   | NO  |
|                                 | NDVI   | 0.290**  | NO  |
|                                 | EVI    | 0.304**  | YES |
|                                 | S2REP  | 0.237*   | YES |
|                                 | REIP   | 0.237*   | NO  |
|                                 | MTCI   | 0.199*   | YES |
|                                 | MCARI  | 0.287**  | NO  |
| Mixed broadleaf–conifer forests | HH     | 0.365**  | YES |
|                                 | HV     | 0.293**  | YES |
|                                 | RFDI   | −0.185*  | YES |
|                                 | VV     | 0.171*   | NO  |
|                                 | VV_MEA | 0.242**  | YES |
|                                 | VV_VAR | 0.231**  | NO  |
|                                 | VV_COR | 0.239**  | NO  |
|                                 | B2     | −0.306** | YES |
|                                 | B3     | −0.299** | NO  |
|                                 | B4     | −0.269** | NO  |
|                                 | B5     | −0.261** | NO  |
|                                 | B11    | −0.285** | NO  |
|                                 | B12    | −0.258** | NO  |
|                                 | NDVI   | 0.192*   | NO  |
|                                 | MCARI  | 0.199*   | YES |
|                                 | H      | 0.392**  | YES |
